# Supplementary material for: Forensic analysis of video steganography tools
Source: PeerJ journal article supplement (doi:10.7717/peerj-cs.7), 2015-05-27
Supplement: Appendix_A.docx [file Appendix_A.docx]

#!/bin/bash

IFS=$'\n'

echo "" > /home/user/Desktop/OmniHide/dumps/OHtmp1

for filename in /home/user/Desktop/Videos/*

do

xxd -p $filename > /home/user/Desktop/OmniHide/dumps/OHtmp2

tail -c 18 < /home/user/Desktop/OmniHide/dumps/OHtmp2 | tr -d '\n' > /home/user/Desktop/OmniHide/dumps/OHtmp3

cat /home/user/Desktop/OmniHide/dumps/OHtmp3 > /home/user/Desktop/OmniHide/dumps/OHtmp1

cat /home/user/Desktop/OmniHide/dumps/OHtmp3 | tr -d '\n' >>/home/user/Desktop/tail.txt | tr -d '\n'

sed -i '/^$/d' /home/user/Desktop/OmniHide/dumps/OHtmp1

sed -i '/^$/d' /home/user/Desktop/tail.txt

source /home/user/Desktop/OmniHide/detect.sh

done
