# Supplementary material for: Forensic analysis of video steganography tools
Source: PeerJ journal article supplement (doi:10.7717/peerj-cs.7), 2015-05-27
Supplement: Appendix_B.docx [file Appendix_B.docx]

#!/bin/bin

IFS=$'\n'

for line in $(< /home/user/Desktop/OmniHide/dumps/OHtmp1); do

result=$(echo $line | grep -Eo [[:digit:]] | wc -l)

if [[ $result -gt 16 ]]; then

echo -e \ "OmniHide Pro content may be present within" $filename >>/home/user/Desktop/results

else

echo -e \ "Omnihide Pro has no presence within" $filename >>/home/user/Desktop/results

fi

done
