# Supplementary material for: Forensic analysis of video steganography tools
Source: PeerJ journal article supplement (doi:10.7717/peerj-cs.7), 2015-05-27
Supplement: Appendix_C.docx [file Appendix_C.docx]

#!/bin/bash

for filename in /home/user/Desktop/Videos/*

do

xxd -p $filename > /home/user/Desktop/tmp1

tr -d '\n' < /home/user/Desktop/tmp1 > /home/user/Desktop/tmp2

if grep -c -q -"9e97ba2a008088c9a370975ba2e499b8c178720f88dddc342b4e7d317fb5e

87039a8b84275687191" /home/ts424/Desktop/tmp2; then

echo -e \ "OurSecret hidden content found in" $filename >> /home/user/Desktop/results

else

echo -e \ "There is no OurSecret content hidden within" $filename >> /home/user/Desktop/results

fi

done
