# Supplementary material for: Forensic analysis of video steganography tools
Source: PeerJ journal article supplement (doi:10.7717/peerj-cs.7), 2015-05-27
Supplement: Appendix_D.docx [file Appendix_D.docx]

#!/bin/bash

catch="invalid atom size, extends outside parent atom"

printf '%s\n' $file | tr -d '\n' >> /home/user/Desktop/EOF/EOFResults.txt

for file in /home/user/Desktop/Videos/*

do

mp4file --dump $file > /home/user/Desktop/EOF/EOFDump

test=$(grep -o "invalid atom size, extends outside parent atom" /home/user/Desktop/EOF/EOFDump)

echo $test >/home/user/Desktop/EOF/EOFtmp1

if [[ $test == $catch ]]

then

echo -e \ "EOF injection detected" >>/home/user/Desktop/EOF/EOFResults.txt

else

echo -e \ "No steganography detected" >>/home/user/Desktop/EOF/EOFResults.txt

fi

done
